# Supplementary material for: Physical mechanisms on FRET and ICT for efficient Y6:PM6 as bulk heterojunction active layers
Source: Royal Society of Chemistry journal article supplement (doi:10.1039/d3cp00819c), 2023-01-01
Supplement: d3cp00819c1.pdf [file d3cp00819c1.pdf]

### Supporting information

Transition density matrix (TDM) refers to the transition density matrix in basis function representation. The TDM between ground state and an excited state can be calculated as

$$P_{\mu\nu}^{tran} = \sum_a^{vir} W_i^a C_{\mu i} C_{\nu a}$$

where  $C_{\mu i}$  denotes the expansion coefficient of basis function  $\mu$  in MO  $i$ . The TDM in real space representation, can be constructed easily via TDM in basis function representation:

$$T(r;r') = \sum_{\mu} \sum_{\nu} P_{\mu\nu}^{tran} \chi_{\mu}(r) \chi_{\nu}(r')$$

where  $\chi$  stands for basis function. The off-diagonal elements of TDM essentially represent the coupling between various basis functions during electron excitation.

Table S1. The long-range separation parameter of the LC-PBE0 functional.

| Molecule       | $\omega$ | $\alpha$ | $\beta$ |
|----------------|----------|----------|---------|
| Y6             | 0.01     | 0.10     | 0.90    |
| PM6            | 0.01     | 0.19     | 0.81    |
| Y6:PM6 complex | 0.01     | 0.10     | 0.90    |
